# Supplementary material for: Multifunctional and stimuli-responsive liposomes in hepatocellular carcinoma diagnosis and therapy
Source: PubMed Central journal article supplement — Transl Oncol. 2024 Apr 30;45:101975. doi: 10.1016/j.tranon.2024.101975 (PMC11070928; doi:10.1016/j.tranon.2024.101975), 2024-04-30
Supplement: mmc1.pdf [file mmc1.pdf]

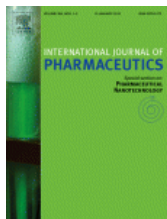

## Cisplatin and curcumin co-loaded nano-liposomes for the treatment of hepatocellular carcinoma

**Author:**

Yao Cheng, Pengxuan Zhao, Shuangping Wu, Tan Yang, Yan Chen, Xiaojuan Zhang, Chuanchuan He, Chao Zheng, Kelin Li, Xiang Ma, Guangya Xiang

**Publication:** International Journal of Pharmaceutics

**Publisher:** Elsevier

**Date:** 10 July 2018

© 2018 Elsevier B.V. All rights reserved.

### Order Completed

Thank you for your order.

This Agreement between Faculty of Veterinary Medicine, University of Tabriz -- Milad Ashrafizadeh ("You") and Elsevier ("Elsevier") consists of your license details and the terms and conditions provided by Elsevier and Copyright Clearance Center.

Your confirmation email will contain your order number for future reference.

**License Number** 5745480653112

[Printable Details](#)

**License date** Mar 10, 2024

#### ✓ Licensed Content

|                                     |                                                                                                                                                                                                                                            |
|-------------------------------------|--------------------------------------------------------------------------------------------------------------------------------------------------------------------------------------------------------------------------------------------|
| <b>Licensed Content Publisher</b>   | Elsevier                                                                                                                                                                                                                                   |
| <b>Licensed Content Publication</b> | International Journal of Pharmaceutics                                                                                                                                                                                                     |
| <b>Licensed Content Title</b>       | Cisplatin and curcumin co-loaded nano-liposomes for the treatment of hepatocellular carcinoma<br>Yao Cheng, Pengxuan Zhao, Shuangping Wu, Tan Yang, Yan Chen, Xiaojuan Zhang, Chuanchuan He, Chao Zheng, Kelin Li, Xiang Ma, Guangya Xiang |
| <b>Licensed Content Author</b>      | Yao Cheng, Pengxuan Zhao, Shuangping Wu, Tan Yang, Yan Chen, Xiaojuan Zhang, Chuanchuan He, Chao Zheng, Kelin Li, Xiang Ma, Guangya Xiang                                                                                                  |
| <b>Licensed Content Date</b>        | Jul 10, 2018                                                                                                                                                                                                                               |
| <b>Licensed Content Volume</b>      | 545                                                                                                                                                                                                                                        |
| <b>Licensed Content Issue</b>       | 1-2                                                                                                                                                                                                                                        |
| <b>Licensed Content Pages</b>       | 13                                                                                                                                                                                                                                         |

#### 📄 Order Details

|                                                     |                              |
|-----------------------------------------------------|------------------------------|
| <b>Type of Use</b>                                  | reuse in a journal/magazine  |
| <b>Requestor type</b>                               | commercial (for-profit)      |
| <b>Portion</b>                                      | figures/tables/illustrations |
| <b>Number of figures/tables/illustrations</b>       | 1                            |
| <b>Circulation</b>                                  | 500000                       |
| <b>Format</b>                                       | both print and electronic    |
| <b>Are you the author of this Elsevier article?</b> | No                           |
| <b>Will you be translating?</b>                     | No                           |

#### 📁 About Your Work

|                                  |                                                                                                    |
|----------------------------------|----------------------------------------------------------------------------------------------------|
| <b>Title of new article</b>      | Multifunctional and stimuli-responsive liposomes in hepatocellular carcinoma diagnosis and therapy |
| <b>Lead author</b>               | Mehrdad hashemi                                                                                    |
| <b>Title of targeted journal</b> | Translational oncology                                                                             |
| <b>Publisher</b>                 | Elsevier                                                                                           |
| <b>Expected publication date</b> | Aug 2024                                                                                           |

#### 📁 Additional Data

|                 |          |
|-----------------|----------|
| <b>Portions</b> | Figure 9 |
|-----------------|----------|

| Requestor Location                                                                                                                                                                                                      | Tax Details                                 |
|-------------------------------------------------------------------------------------------------------------------------------------------------------------------------------------------------------------------------|---------------------------------------------|
|                                                                                                                                                                                                                         |                                             |
| <b>Requestor Location</b><br>Faculty of Veterinary<br>Medicine, University of Tabriz<br>Tehran, Iran<br><br>Tehran, other<br>Iran, Islamic Republic Of<br>Attn: Faculty of Veterinary<br>Medicine, University of Tabriz |                                             |
| <b>CLOSE WINDOW</b>                                                                                                                                                                                                     | <b>Total: 0.00 USD</b><br><b>ORDER MORE</b> |
