# Supplementary material for: Multifunctional and stimuli-responsive liposomes in hepatocellular carcinoma diagnosis and therapy
Source: PubMed Central journal article supplement — Transl Oncol. 2024 Apr 30;45:101975. doi: 10.1016/j.tranon.2024.101975 (PMC11070928; doi:10.1016/j.tranon.2024.101975), 2024-04-30
Supplement: mmc2.pdf [file mmc2.pdf]

### pH-Responsive Liposomes Loaded with Targeting Procoagulant Proteins as Potential Embolic Agents for Solid Tumor-Targeted Therapy

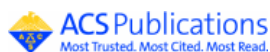

**Author:** Li Wang, Lanlan Wang, Peilan Xu, et al

**Publication:** Molecular Pharmaceutics

**Publisher:** American Chemical Society

**Date:** May 1, 2022

*Copyright © 2022, American Chemical Society*

#### PERMISSION/LICENSE IS GRANTED FOR YOUR ORDER AT NO CHARGE

This type of permission/license, instead of the standard Terms and Conditions, is sent to you because no fee is being charged for your order. Please note the following:

- Permission is granted for your request in both print and electronic formats, and translations.
- If figures and/or tables were requested, they may be adapted or used in part.
- Please print this page for your records and send a copy of it to your publisher/graduate school.
- Appropriate credit for the requested material should be given as follows: "Reprinted (adapted) with permission from {COMPLETE REFERENCE CITATION}. Copyright {YEAR} American Chemical Society." Insert appropriate information in place of the capitalized words.
- One-time permission is granted only for the use specified in your RightsLink request. No additional uses are granted (such as derivative works or other editions). For any uses, please submit a new request.

If credit is given to another source for the material you requested from RightsLink, permission must be obtained from that source.

[BACK](#)

[CLOSE WINDOW](#)
