# Supplementary material for: Multifunctional and stimuli-responsive liposomes in hepatocellular carcinoma diagnosis and therapy
Source: PubMed Central journal article supplement — Transl Oncol. 2024 Apr 30;45:101975. doi: 10.1016/j.tranon.2024.101975 (PMC11070928; doi:10.1016/j.tranon.2024.101975), 2024-04-30
Supplement: mmc3.pdf [file mmc3.pdf]

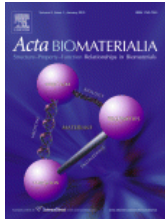

## A stabilized retro-inverso peptide ligand of transferrin receptor for enhanced liposome-based hepatocellular carcinoma-targeted drug delivery

**Author:**

Jiajing Tang, Qiantao Wang, Qianwen Yu, Yue Qiu, Ling Mei, Dandan Wan, Xuhui Wang, Man Li, Qin He

**Publication:** Acta Biomaterialia**Publisher:** Elsevier**Date:** 1 January 2019

© 2018 Acta Materialia Inc. Published by Elsevier Ltd. All rights reserved.

### Order Completed

Thank you for your order.

This Agreement between Faculty of Veterinary Medicine, University of Tabriz -- Milad Ashrafizadeh ("You") and Elsevier ("Elsevier") consists of your license details and the terms and conditions provided by Elsevier and Copyright Clearance Center.

Your confirmation email will contain your order number for future reference.

**License Number** 5745481066709

[Printable Details](#)

**License date** Mar 10, 2024

|  Licensed Content      |                                                                                                                                               |  Order Details    |                              |
|--------------------------------------------------------------------------------------------------------|-----------------------------------------------------------------------------------------------------------------------------------------------|---------------------------------------------------------------------------------------------------|------------------------------|
| <b>Licensed Content Publisher</b>                                                                      | Elsevier                                                                                                                                      | <b>Type of Use</b>                                                                                | reuse in a journal/magazine  |
| <b>Licensed Content Publication</b>                                                                    | Acta Biomaterialia                                                                                                                            | <b>Requestor type</b>                                                                             | commercial (for-profit)      |
| <b>Licensed Content Title</b>                                                                          | A stabilized retro-inverso peptide ligand of transferrin receptor for enhanced liposome-based hepatocellular carcinoma-targeted drug delivery | <b>Portion</b>                                                                                    | figures/tables/illustrations |
| <b>Licensed Content Author</b>                                                                         | Jiajing Tang,Qiantao Wang,Qianwen Yu,Yue Qiu,Ling Mei,Dandan Wan,Xuhui Wang,Man Li,Qin He                                                     | <b>Number of figures/tables/illustrations</b>                                                     | 1                            |
| <b>Licensed Content Date</b>                                                                           | Jan 1, 2019                                                                                                                                   | <b>Circulation</b>                                                                                | 500000                       |
| <b>Licensed Content Volume</b>                                                                         | 83                                                                                                                                            | <b>Format</b>                                                                                     | both print and electronic    |
| <b>Licensed Content Issue</b>                                                                          | n/a                                                                                                                                           | <b>Are you the author of this Elsevier article?</b>                                               | No                           |
| <b>Licensed Content Pages</b>                                                                          | 11                                                                                                                                            | <b>Will you be translating?</b>                                                                   | No                           |
|  About Your Work      |                                                                                                                                               |  Additional Data |                              |
| <b>Title of new article</b>                                                                            | Multifunctional and stimuli-responsive liposomes in hepatocellular carcinoma diagnosis and therapy                                            | <b>Portions</b>                                                                                   | Figure 9                     |
| <b>Lead author</b>                                                                                     | Mehrdad hashemi                                                                                                                               |                                                                                                   |                              |
| <b>Title of targeted journal</b>                                                                       | Translational oncology                                                                                                                        |                                                                                                   |                              |
| <b>Publisher</b>                                                                                       | Elsevier                                                                                                                                      |                                                                                                   |                              |
| <b>Expected publication date</b>                                                                       | Aug 2024                                                                                                                                      |                                                                                                   |                              |
|  Requestor Location |                                                                                                                                               |  Tax Details   |                              |
| <b>Requestor Location</b>                                                                              | Faculty of Veterinary Medicine, University of Tabriz<br>Tehran, Iran                                                                          |                                                                                                   |                              |
|                                                                                                        | Tehran, other<br>Iran, Islamic Republic Of<br>Attn: Faculty of Veterinary Medicine, University of Tabriz                                      |                                                                                                   |                              |
|                                                                                                        |                                                                                                                                               |                                                                                                   | <b>Total: 0.00 USD</b>       |
| <a href="#">CLOSE WINDOW</a>                                                                           |                                                                                                                                               | <a href="#">ORDER MORE</a>                                                                        |                              |
